# Supplementary material for: Machine learning approaches in the therapeutic outcome prediction in major depressive disorder: a systematic review
Source: Frontiers journal article supplement (doi:10.3389/fpsyt.2025.1588963), 2025-08-13
Supplement: Data_Sheet_3.pdf [file Data_Sheet_3.pdf]

**Table 1:** Performance metrics of internally validated models (approaches with largest predictor sets) using clinical-sociodemographic data and providing at least data on AUC or accuracy.

| Publication                           | Internal validation                                                                                                 | Pharmacological intervention                            | Predicted outcome              | ML model         | AUC                               | Accuracy | Sensitivity | Specificity |
|---------------------------------------|---------------------------------------------------------------------------------------------------------------------|---------------------------------------------------------|--------------------------------|------------------|-----------------------------------|----------|-------------|-------------|
| <b>Clinical-sociodemographic data</b> |                                                                                                                     |                                                         |                                |                  |                                   |          |             |             |
| Iniesta et al. (2016)                 | 10-fold cross- validation, cross-drug analysis<br>(largest predictor set with random patient allocation considered) | Antidepressant (Escitalopram)                           | Remission                      | ENRR             | Escitalopram: 0.75                | -        | -           | -           |
|                                       |                                                                                                                     | Antidepressant (Nortriptyline)                          | Remission                      | ENRR             | Nortriptyline: 0.70               | -        | -           | -           |
|                                       |                                                                                                                     | Antidepressant (Nortriptyline+ Escitalopram)            | Remission                      | ENRR             | Escitalopram+ Nortriptyline: 0.74 | -        | -           | -           |
| Nie et al. (2018)                     | 10-fold cross-validation (full set of features considered)                                                          | Antidepressant (Citalopram)                             | Treatment Resistant Depression | RF               | 0.78                              | 70%      | 69%         | 71%         |
|                                       |                                                                                                                     |                                                         |                                | GBDT             | 0.78                              | 70%      | 69%         | 71%         |
|                                       |                                                                                                                     |                                                         |                                | XGBoost          | 0.76                              | 67%      | 72%         | 64%         |
|                                       |                                                                                                                     |                                                         |                                | l2 PLR           | 0.69                              | 63%      | 65%         | 62%         |
| Sheu et al. (2023) (46)               | Hold-out cross-validation (likelihood score and inclusion of deep-learning imputed labels not considered)           | Antidepressant (SSRI, SNRI, Bupropion, and Mirtazapine) | Response                       | Regularized GLM  | 0.73                              | 70%      | 83%         | 57%         |
|                                       |                                                                                                                     |                                                         |                                | RF               | 0.73                              | 70%      | 68%         | 72%         |
|                                       |                                                                                                                     |                                                         |                                | GBM              | 0.73                              | 69%      | 82%         | 56%         |
|                                       |                                                                                                                     |                                                         |                                | Feed-forward DNN | 0.70                              | 67%      | 51%         | 82%         |
| Sajjadian et al. (2023)               | Nested cross- validation (largest predictor set,, baseline predictors, no feature selection)                        | Antidepressant (Escitalopram)                           | Response                       | Naïve Bayes      | -                                 | 55%      | 65%         | 45%         |
|                                       |                                                                                                                     |                                                         |                                | SVM              | -                                 | 56%      | 39%         | 73%         |
| Poirot et al. (2024)                  | Nested cross- validation, randomized K-fold cross-validation, (largest predictor set without selection)             | Antidepressant (Sertraline)                             | Pretreatment Remission         | XGBoost          | 0.48                              | 47%      | 48%         | 45%         |
|                                       |                                                                                                                     |                                                         | Pretreatment Response          | XGBoost          | 0.53                              | 53%      | 54%         | 53%         |
|                                       |                                                                                                                     |                                                         | Early-Treatment Remission      | XGBoost          | 0.62                              | 59%      | 61%         | 58%         |
|                                       |                                                                                                                     |                                                         | Early-Treatment Response       | XGBoost          | 0.58                              | 55%      | 56%         | 56%         |

ENRR: Elastic Net Regularized Regression; RF: Random Forest; GBDT: Gradient Boosted Decision Trees; XGBoost: Extreme Gradient Boosting; PLR: Penalized Logistic Regression; GLM: General Linear Models; GBM: Gradient Boosting Machine; DNN: Deep Neural Network; SVM: Support Vector Machine

**Table 2:** Comparison of ML-approaches using clinical-sociodemographic and molecular biomarker data (metabolomics) and the metabolomics model with additional molecular biomarker data represented by 6 SNPs (multi-omics) in outcome predictions of combination antidepressant therapy (Joyce. et al (2021))

| ML method performance                                                             | Patient Set                                                                                                      | M 1 (Metabolomics) |                          | M 2 (Multi-omics) |                          |
|-----------------------------------------------------------------------------------|------------------------------------------------------------------------------------------------------------------|--------------------|--------------------------|-------------------|--------------------------|
|                                                                                   |                                                                                                                  | XGBoost AUC        | Penalized regression AUC | XGBoost AUC       | Penalized regression AUC |
| Internal validation (repeated cross-validation)                                   | <b>Training Set 1:</b><br>PGRN-AMPS Escitalopram, PGRN-AMPS Citalopram, and CO-MED Escitalopram+placebo patients | 0.69               | 0.69                     | 0.68              | 0.72                     |
| Internal validation (repeated cross-validation)                                   | <b>Training Set 2:</b><br>PGRN-AMPS Escitalopram, PGRN-AMPS Citalopram patients                                  | 0.68               | 0.68                     | 0.72              | 0.72                     |
| Internal-external validation<br><b>Training Set 1</b>                             | <b>Testing-Set:</b><br>CO-MED Venlafaxine+Mirtazapine, Escitalopram+Bupropion patients                           | 0.76               | 0.85                     | 0.83              | 0.86                     |
| External validation (Cross-trial replication experiment)<br><b>Training Set 2</b> | <b>Testing-Set:</b><br>CO-MED Venlafaxine+Mirtazapine, Escitalopram+Bupropion patients                           | 0.75               | 0.84                     | 0.74              | 0.86                     |

PGRN-AMPS: Pharmacogenomics Research Network Antidepressant Medication Pharmacogenomic Study, CO-MED: Combined Medications to Enhance Outcomes of Antidepressant Therapy, Model 1 (M1): Clinical data (depression related) + sociodemographic data + molecular biomarker data (metabolomics), M2: M1+ molecular biomarker data (multi-omics: metabolomics +6 functionally validated single-nucleotide polymorphisms (SNPs))

**Table 3:** Outcome prediction performance of applied models based on single and combined data categories. F1 scores for model 1 reflect the range of performance on the basis of eLORETA and surface-level EEG data. The mean AUC for Random Forest, calculated across all EEG bands, was 0.721 for eLORETA and 0.722 for surface-level EEG data in distinguishing antidepressant responders from non-responders (Jaworska et al. (2019)).

| ML Methods | Model 1 (EEG Data (band power)) |             | Model 2 (Clinical-demographic Data) |          | Model 3 (EEG + Clinical-demographic data) |          |
|------------|---------------------------------|-------------|-------------------------------------|----------|-------------------------------------------|----------|
|            | AUC                             | F1 Score    | AUC                                 | F1 Score | AUC                                       | F1 Score |
| RF         | 0.62-0.80                       | 0.674-0.803 | 0.74                                | 0.737    | 0.901                                     | 0.901    |
| SVM        |                                 | 0.507-0.768 |                                     | 0.62     |                                           | 0.716    |
| AdaBoost   |                                 | 0.576-0.775 |                                     | 0.715    |                                           | 0.838    |
| CART       |                                 | 0.560-0.757 |                                     | 0.652    |                                           | 0.791    |
| MLP        |                                 | 0.533-0.771 |                                     | 0.544    |                                           | 0.687    |
| GNB        |                                 | 0.497-0.756 |                                     | 0.534    |                                           | 0.775    |

Machine Learning methods (ML): RF: Random Forest, SVM: Support Vector Machine, AdaBoost: Adaptive Boosting, CART: Classification and Regression Tree, MLP: Multi-Layer Perceptron, GNB: Gaussian Naive Bayes.

**Table 4:** Effect of the combination of clinical-sociodemographic and molecular biomarker data on prediction performance in MDD (Chen. B et al (2023))

| ML Methods          | Model 1 |          | Model 2 |          | Model 3 |          |
|---------------------|---------|----------|---------|----------|---------|----------|
|                     | AUC     | Accuracy | AUC     | Accuracy | AUC     | Accuracy |
| RF                  | 0.581   | 57.7%    | 0.59    | 62.8%    | 0.611   | 62.5%    |
| SVM                 | 0.51    | 61.7%    | 0.516   | 61.5%    | 0.508   | 61.3%    |
| LogiTBoost          | 0.569   | 62.4%    | 0.571   | 59.9%    | 0.57    | 59.8%    |
| Rpart               | 0.508   | 56.3%    | 0.53    | 56.9%    | 0.53    | 56.6%    |
| Logistic Regression | 0.551   | 58.9%    | 0.524   | 54.4%    | 0.504   | 55.4%    |

Mode 1: Clinical-sociodemographic data (without RFE); Model2: Molecular biomarker data (without RFE); Model 3: Molecular biomarker data + Clinical-sociodemographic data (without RFE). RF: Random Forest, SVM: Support Vector Machine, LogiTBoost: Logistic Boosting, Rpart: Recursive Partitioning and Regression Trees, Logistic Regression: Logistic Regression
